# Supplementary material
Source: publisher figshare collection journal article supplement (https://sage.figshare.com/ndownloader/files/21922632)
Supplement: Supplementary file 1 [file 21922632]

**Supplementary material**

Please refer to: <https://svs.onlinesurveys.ac.uk/knees-and-teeth-syndromekats-follow-up-survey> (Knees and Teeth Syndrome (KaTS) follow-up survey).
